# Supplementary material for: P-doped CoCO3 nanosheets: an ultra-active versatile electrocatalyst for hydrogen evolution, oxygen evolution and hydrazine oxidation reactions
Source: Royal Society of Chemistry journal article supplement (doi:10.1039/d1se00100k), 2021-01-01
Supplement: d1se00100k1.pdf [file d1se00100k1.pdf]

## Supporting Information

P-Doped  $\text{CoCO}_3$  Nanosheets: An Ultra-active Versatile  
Electrocatalyst for Hydrogen Evolution, Oxygen Evolution and  
Hydrazine Oxidation Reactions

*Fenggang Liu,<sup>a</sup> Huizhen Li,<sup>\*a</sup> Yunhui Li,<sup>a</sup> Qinghe Cao<sup>\*c</sup>, Xinhua Geng,<sup>a</sup> Caiqin Gu,<sup>a</sup>*

*Wenming Sun<sup>\*b</sup> and Jiahai Wang<sup>\*a</sup>*

<sup>a</sup>Guangzhou Key Laboratory for New Energy and Green Catalysis, School of Chemistry  
and Chemical Engineering, Guangzhou University, Guangzhou, 510006, P. R. China.

<sup>b</sup>College of Science, China Agricultural University, Beijing 100193, P. R. China.

<sup>c</sup>Frontiers Science Center for Flexible Electronics, Institute of Flexible Electronics,  
Northwestern Polytechnical University, Xi'an 710072, P. R. China.

## Table of Contents

|                                                                                                                                                                                                                                                                                                                                                                                                                                   |    |
|-----------------------------------------------------------------------------------------------------------------------------------------------------------------------------------------------------------------------------------------------------------------------------------------------------------------------------------------------------------------------------------------------------------------------------------|----|
| 1. EXPERIMENTAL SECTION .....                                                                                                                                                                                                                                                                                                                                                                                                     | 4  |
| Materials .....                                                                                                                                                                                                                                                                                                                                                                                                                   | 4  |
| Synthesis of $\text{CoCO}_3$ nanosheets on Co Foam .....                                                                                                                                                                                                                                                                                                                                                                          | 4  |
| Synthesis of P- $\text{CoCO}_3$ nanosheets on Co Foam.....                                                                                                                                                                                                                                                                                                                                                                        | 4  |
| Characterizations .....                                                                                                                                                                                                                                                                                                                                                                                                           | 4  |
| Electrochemical measurements .....                                                                                                                                                                                                                                                                                                                                                                                                | 5  |
| Computational Details .....                                                                                                                                                                                                                                                                                                                                                                                                       | 5  |
| 2. SUPPORTING RESULTS .....                                                                                                                                                                                                                                                                                                                                                                                                       | 7  |
| Fig. S1 SEM image of $\text{CoCO}_3/\text{CF}$ .....                                                                                                                                                                                                                                                                                                                                                                              | 7  |
| Fig. S2 A, B) Low-resolution TEM images; C, D) SAED patterns and E, F) Elemental mapping images of $\text{CoCO}_3$ and P- $\text{CoCO}_3$ .....                                                                                                                                                                                                                                                                                   | 8  |
| Fig. S3 TEM-EDS spectra of A) $\text{CoCO}_3/\text{CF}$ and B) P- $\text{CoCO}_3/\text{CF}$ .....                                                                                                                                                                                                                                                                                                                                 | 9  |
| Fig. S4 Full XPS spectra of $\text{CoCO}_3/\text{CF}$ and P- $\text{CoCO}_3/\text{CF}$ . .....                                                                                                                                                                                                                                                                                                                                    | 10 |
| Fig. S5 CV curves of A) P- $\text{CoCO}_3/\text{CF}$ , C) $\text{CoCO}_3/\text{CF}$ and E) Co Foam at different scan rate in 1 M KOH in the non-faradaic potential region. Plots of current density versus voltage scan rate for B) P- $\text{CoCO}_3/\text{CF}$ , D) $\text{CoCO}_3/\text{CF}$ and F) Co Foam. ....                                                                                                              | 11 |
| Fig. S6. LSV plots of P- $\text{CoCO}_3$ , $\text{CoCO}_3$ and Co foam for A) HER and B) OER. The current densities are calculated based on ECSA. ....                                                                                                                                                                                                                                                                            | 12 |
| Fig. S7 Quantitative $\text{H}_2$ and $\text{O}_2$ measurement via water displacement. ....                                                                                                                                                                                                                                                                                                                                       | 13 |
| Fig. S8 Performance test for overall water splitting conducted in 1 M KOH. A) LSV curves of the P- $\text{CoCO}_3(+) \text{P-CoCO}_3(-)$ and $\text{RuO}_2(+) \text{Pt/C}(-)$ electrolytic system toward water splitting. B) Chronoamperometry of water electrolysis of the P- $\text{CoCO}_3(+) \text{P-CoCO}_3(-)$ system at a voltage of 1.63 V versus RHE. ....                                                               | 14 |
| Fig. S9 LSV plots of P- $\text{CoCO}_3/\text{CF}$ toward different concentrations of hydrazine (0.3~1 M).14                                                                                                                                                                                                                                                                                                                       |    |
| Fig. S10 The overpotentials needed of P- $\text{CoCO}_3/\text{CF}$ , $\text{CoCO}_3/\text{CF}$ , Co Foam, Pt/C and $\text{RuO}_2$ for HzOR ( $j = 50/100/500 \text{ mA cm}^{-2}$ ). ....                                                                                                                                                                                                                                          | 15 |
| Fig. S11 LSV curves of P- $\text{CoCO}_3/\text{CF}$ for initial and after stability test in 1 M KOH with 0.3 M hydrazine solution. Initial performance of P- $\text{CoCO}_3/\text{CF}$ for HzOR (black line). The performance of P- $\text{CoCO}_3/\text{CF}$ after stability test (red line). The performance of P- $\text{CoCO}_3/\text{CF}$ after the stability test tested in the newly configured solution (blue line). .... | 15 |
| Fig. S12 A, B, C) Plots of current density versus voltage scan rate for P- $\text{CoCO}_3/\text{CF}$ , $\text{CoCO}_3/\text{CF}$ , Co Foam. D) Niquist plots for P- $\text{CoCO}_3/\text{CF}$ , $\text{CoCO}_3/\text{CF}$ , Co Foam. All of the experiments were carried out in 1.0 M KOH with 0.3 M hydrazine.....                                                                                                               | 16 |

|                                                                                                                                                                                                                                                                                                                                                                                                                                                                                                                                                                           |    |
|---------------------------------------------------------------------------------------------------------------------------------------------------------------------------------------------------------------------------------------------------------------------------------------------------------------------------------------------------------------------------------------------------------------------------------------------------------------------------------------------------------------------------------------------------------------------------|----|
| Fig. S13. LSV plots of P-CoCO <sub>3</sub> , CoCO <sub>3</sub> and Co foam for HzOR. The current densities are calculated based on ECSA.....                                                                                                                                                                                                                                                                                                                                                                                                                              | 17 |
| Fig. S14 A) LSV curves for the P-CoCO <sub>3</sub> /CF toward different concentrations of hydrazine. B) LSV curves of P-CoCO <sub>3</sub> /CF for the HER and HzOR in 1 M KOH with 0.3 M N <sub>2</sub> H <sub>4</sub> solution. ....                                                                                                                                                                                                                                                                                                                                     | 18 |
| Fig. S15 Faraday efficiency measured for hydrogen production in 1 M KOH with 0.3 M N <sub>2</sub> H <sub>4</sub> solution. ....                                                                                                                                                                                                                                                                                                                                                                                                                                           | 19 |
| Fig. S16 LSV curves for the P-CoCO <sub>3</sub> /CF(+)  P-CoCO <sub>3</sub> /CF(-) couple for initial and after stability test in 1 M KOH with 0.3 M hydrazine solution. Initial performance of P-CoCO <sub>3</sub> /CF(+)  P-CoCO <sub>3</sub> /CF(-) couple for HzOR (black line). The performance of P-CoCO <sub>3</sub> /CF(+)  P-CoCO <sub>3</sub> /CF(-) couple after stability test (red line). The performance of P-CoCO <sub>3</sub> /CF(+)  P-CoCO <sub>3</sub> /CF(-) couple after the stability test tested in the newly configured solution (blue line)..... | 20 |
| Fig. S17 SEM images of P-CoCO <sub>3</sub> /CF after A, B) HER, C, D) OER and E, F) HzOR stability test. ....                                                                                                                                                                                                                                                                                                                                                                                                                                                             | 21 |
| Fig. S18 A) XPS full spectrum of P-CoCO <sub>3</sub> /CF before and after the anode and cathode catalysis. B) XPS spectra of Co 2p for P-CoCO <sub>3</sub> /CF before and after HER test. C) XPS spectra of Co 2p for P-CoCO <sub>3</sub> /CF before and after OER test. D) XPS spectra of Co 2p for P-CoCO <sub>3</sub> /CF before and after HzOR test. ....                                                                                                                                                                                                             | 22 |
| Fig. S19. Total DOS of CoCO <sub>3</sub> and P-CoCO <sub>3</sub> (104) surface. The positive and negative values of PDOS indicated the up and down spins, respectively. ....                                                                                                                                                                                                                                                                                                                                                                                              | 22 |
| Table S1 The elements content in P-CoCO <sub>3</sub> /CF derived from XPS. ....                                                                                                                                                                                                                                                                                                                                                                                                                                                                                           | 23 |
| Table S2 Comparisons of HER performances of P-CoCO <sub>3</sub> /CF with other cost-effective metal HER catalysts in 1.0 M KOH. ....                                                                                                                                                                                                                                                                                                                                                                                                                                      | 23 |
| Table S3 Comparisons of OER performances of P-CoCO <sub>3</sub> /CF with other cost-effective metal OER catalysts in 1.0 M KOH. ....                                                                                                                                                                                                                                                                                                                                                                                                                                      | 24 |
| Table S4 Comparisons of overall water-splitting performance of P-CoCO <sub>3</sub> /CF  P-CoCO <sub>3</sub> /CF with other cost-effective metal bifunctional catalysts in 1.0 M KOH.....                                                                                                                                                                                                                                                                                                                                                                                  | 25 |
| Table S5. Comparisons of HzOR performances of P-CoCO <sub>3</sub> /CF with other HzOR catalysts. ....                                                                                                                                                                                                                                                                                                                                                                                                                                                                     | 26 |
| Table S6. Lists of applied voltage for H <sub>2</sub> production from water electrolysis assisted by small molecules oxidation in recent reports. ....                                                                                                                                                                                                                                                                                                                                                                                                                    | 27 |
| Table S7. Bond lengths of all the species (Å). ....                                                                                                                                                                                                                                                                                                                                                                                                                                                                                                                       | 27 |
| REFERENCE .....                                                                                                                                                                                                                                                                                                                                                                                                                                                                                                                                                           | 28 |

# 1. EXPERIMENTAL SECTION

## Materials

CO(NH<sub>2</sub>)<sub>2</sub>, NH<sub>4</sub>F, KOH, NaH<sub>2</sub>PO<sub>2</sub>, hydrazine, ethanol, hydrochloric acid, and acetone (Sinopharm Chemical Reagent Co., Ltd); Pt/C (20 wt% Pt, Shanghai Macklin Biochemical Co., Ltd); RuO<sub>2</sub> (Aladdin Ltd); Co Foam (KunShan Kunag Xun electronics Co., Ltd) were used as received.

## Synthesis of CoCO<sub>3</sub> nanosheets on Co Foam

A piece of Co foam (1 cm × 4 cm) was sequentially cleaned by sonication in hydrochloric acid, ethanol and deionized water for 15 min, respectively. First, NH<sub>4</sub>F (0.147 g, 5 mmol) and CO(NH<sub>2</sub>)<sub>2</sub> (0.720 g, 12 mmol) were dissolved in deionized water (40 mL) with vigorous continuously stirring for 30 min, a clear solution was obtained. Second, the clear solution with a piece of dried Co foam were placed into a Teflon autoclave. In an electric oven, the autoclave was heated at 140 °C for 24 h to obtain CoCO<sub>3</sub> precursor.

## Synthesis of P-CoCO<sub>3</sub> nanosheets on Co Foam

To prepare P-CoCO<sub>3</sub> samples, the CoCO<sub>3</sub> precursor was placed at the downstream side of a tube furnace and NaH<sub>2</sub>PO<sub>2</sub> (3 g, 34 mmol) was placed at the opposite side. Then the samples were heated to 300 °C in Ar atmosphere for 90 min, and cooled down to room temperature naturally, and the P-CoCO<sub>3</sub> nanosheets was obtained.

## Characterizations

X-ray diffraction (XRD) was carried out on a Bruker D8 ADVANCE

Diffractionmeter (with Cu  $K\alpha$  radiation). X-ray photoelectron spectroscopy (XPS) measurements was measured on a Thermo Scientific Escalab 250Xi X-ray photoelectron spectrometer. SEM was implemented on a SU8010. TEM and HRTEM were conducted on a JEM-2100. EDS and EA were measured in a scanning (STEM) mode.

### **Electrochemical measurements**

Electrochemical measurements were conducted on a CHI660E electrochemical workstation (CH Instruments, Inc., Shanghai). P-CoCO<sub>3</sub>/CF was directly used as the working electrode, the graphite and saturated calomel electrode (SCE) were used as counter electrode and reference electrode, respectively. By using the Nernst equation  $E(\text{RHE}) = E(\text{SCE}) + 0.0591 \text{ pH} + 0.2415 - 0.000761 (T - 298.15)$  ( $T$ : temperature), all of the data listed in this work were calibrated versus the RHE. LSV curves were obtained at a scan rate of 2 mV/s. The EIS were recorded at the frequency range of 100 -1 Hz with an AC amplitude of 5 mV.

### **Computational Details**

By using the plane-wave pseudopotential method, DFT computations were carried out. The interaction of electron-ion was dealt with ultrasoft pseudopotentials, which created with the PBE functional.<sup>1</sup> For the electron wave functions, a plane-wave basis set was used and the kinetic energy cutoff is 380 eV.<sup>1</sup> The spin-unrestricted method was used in all calculations. For bulk CoCO<sub>3</sub>, a 4×4×1 uniform  $k$ -point mesh was set as the Brillouin zone of the supercell. The optimized lattice constants for CoCO<sub>3</sub> are  $a = b = 4.593 \text{ \AA}$ , and  $c = 15.063 \text{ \AA}$ , which match well with them in database.<sup>2</sup> The (1×2)

CoCO<sub>3</sub> (104) slab with six atomic layers thickness (120 atoms included) was modeled to represent the CoCO<sub>3</sub> surface. The vacuum layer (15 Å) was used for avoiding the interactions among periodic images. Dipole moment correction was introduced. During optimization, only the top three layers were allowed to relax, where the total energy convergence is below 10<sup>-5</sup> eV, and the maximum atomic forces is smaller than 0.03 eV/Å. By using the method of Norskov, the free energy diagrams of HzOR and HER were calculated according to the following equation  $\Delta G = \Delta E + \Delta E_{\text{ZPE}} - T\Delta S$  ( $\Delta E$ : the calculated total energy change;  $\Delta E_{\text{ZPE}}$ : the calculated change in zero-point energy;  $\Delta S$ : the calculated change in entropy).<sup>3</sup>

## REFERENCES

- (1) Perdew, J. P.; Burke, K.; Ernzerhof, M. Generalized Gradient Approximation Made Simple. *Phys. Rev. Lett.* **1996**, *77*, 3865–3868.
- (2) Jain, A.; Ong, S. P.; Hautier, G.; Chen, W.; Richards, W. D.; Dacek, S.; Cholia, S.; Gunter, D.; Skinner, D.; Ceder, G.; Persson, K. A. Commentary: The Materials Project: A materials genome approach to accelerating materials innovation. *APL Materials* **2013**, *1*, 011002.
- (3) Skúlason, E.; Tripkovic, V.; Björketun, M. E.; Gudmundsdóttir, S.; Karlberg, G.; Rossmeisl, J.; Bligaard, T.; Jónsson, H. Nørskov, J. K. Modeling the electrochemical hydrogen oxidation and evolution reactions on the basis of density functional theory calculations. *J. Phys. Chem. C* **2010**, *114*, 18182–18197.

## 2. SUPPORTING RESULTS

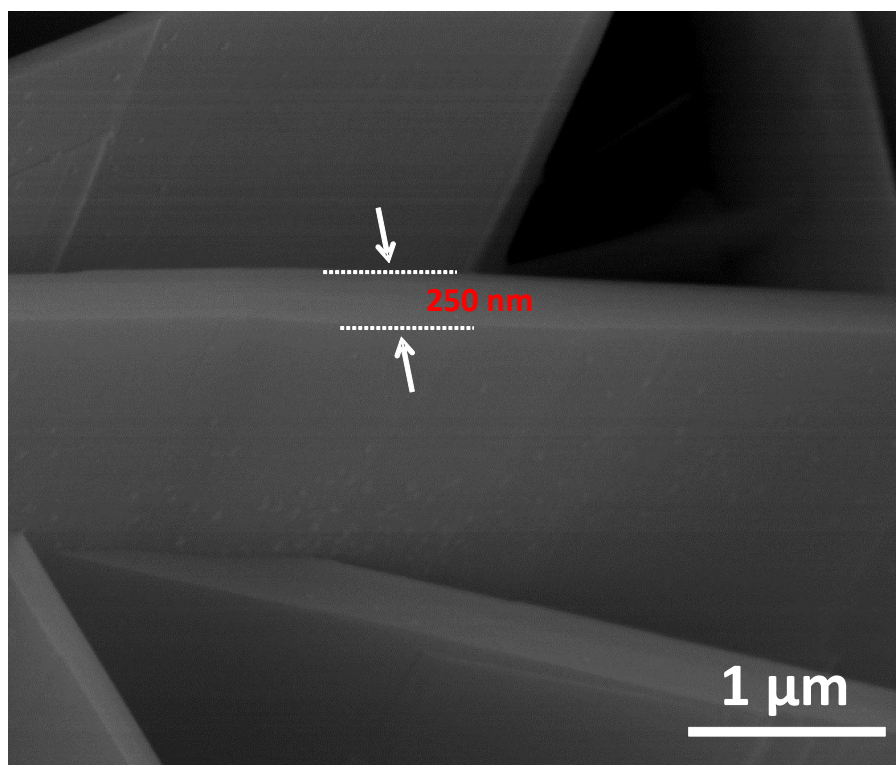

Fig. S1 SEM image of  $\text{CoCO}_3/\text{CF}$ .

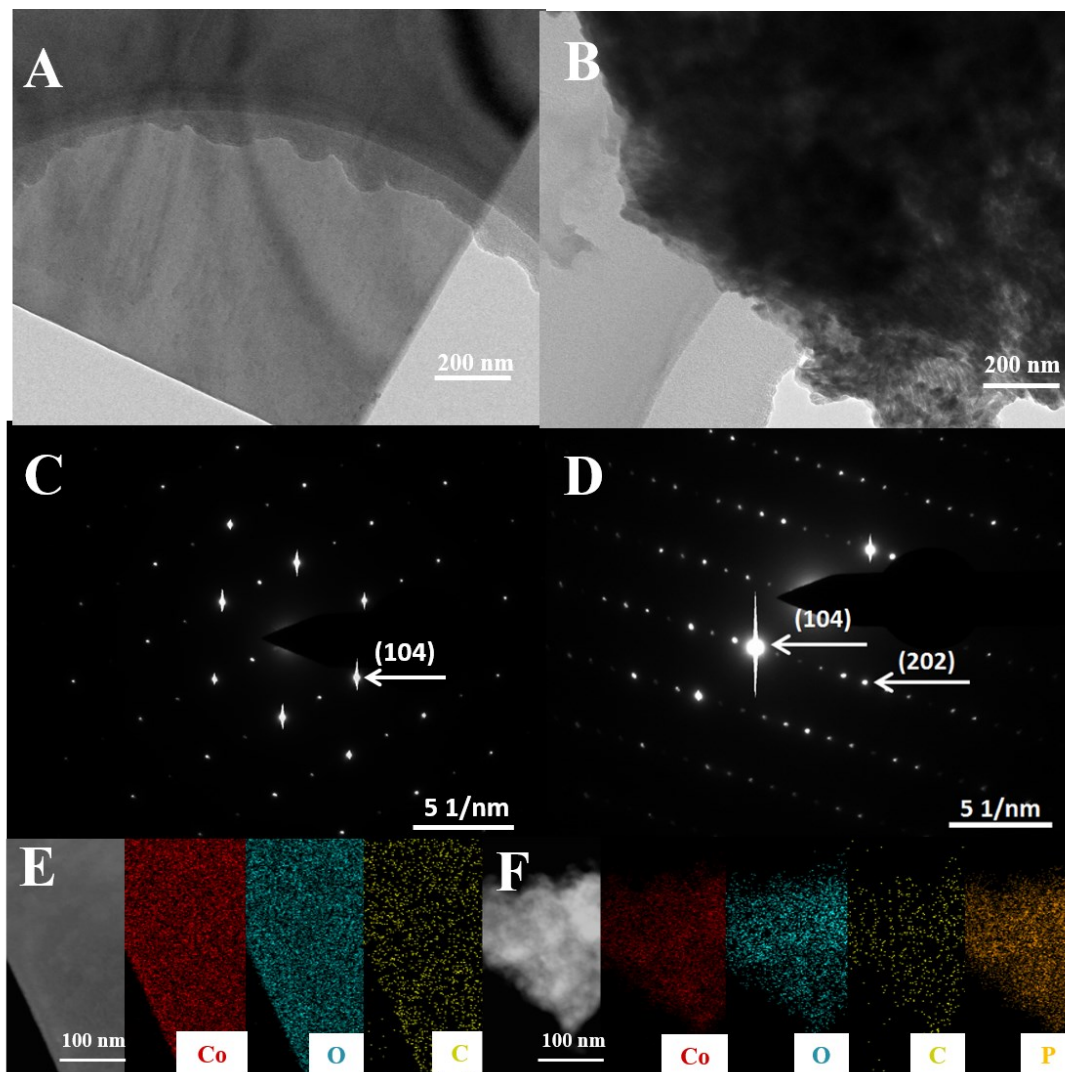

Fig. S2 A, B) Low-resolution TEM images; C, D) SAED patterns and E, F) Elemental mapping images of  $\text{CoCO}_3$  and  $\text{P-CoCO}_3$ .



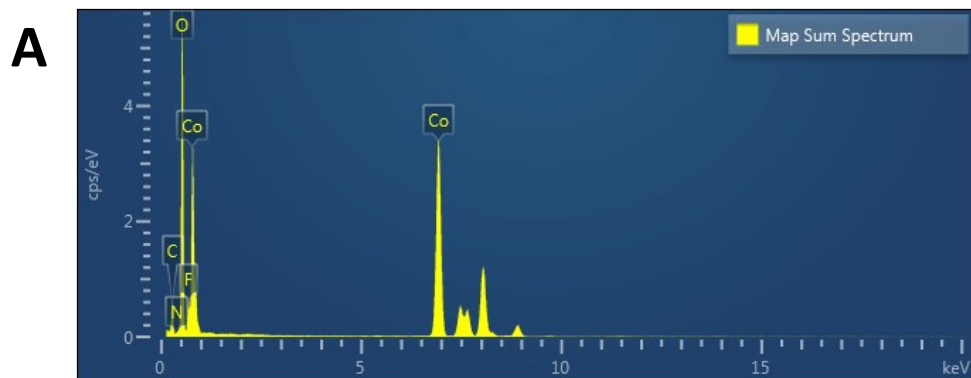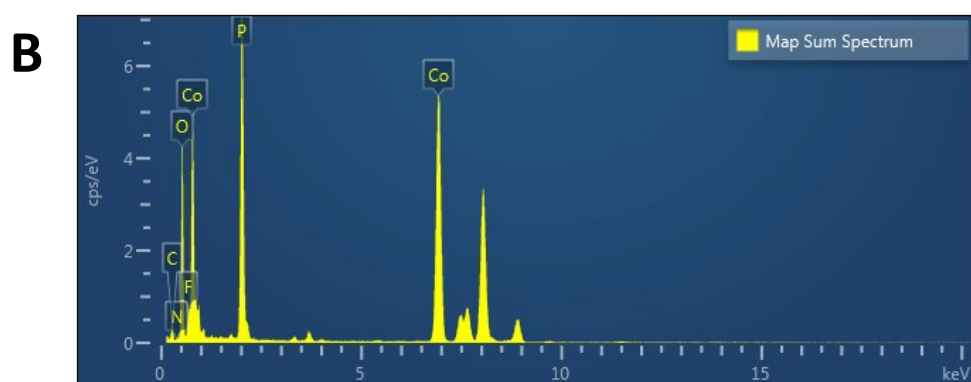

Fig. S3 TEM-EDS spectra of A)  $\text{CoCO}_3/\text{CF}$  and B)  $\text{P-CoCO}_3/\text{CF}$ .

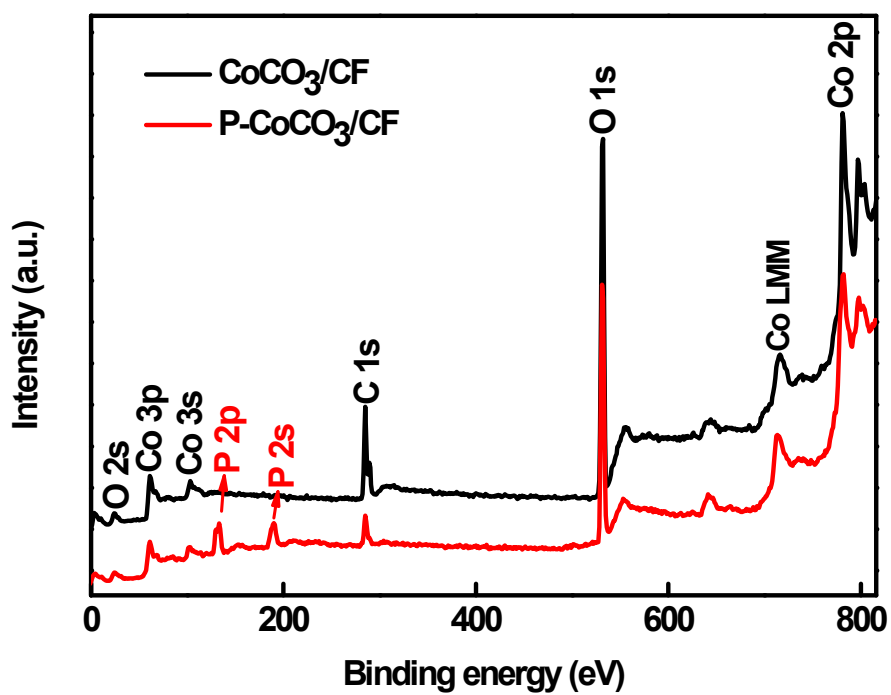

Fig. S4 Full XPS spectra of CoCO<sub>3</sub>/CF and P-CoCO<sub>3</sub>/CF.

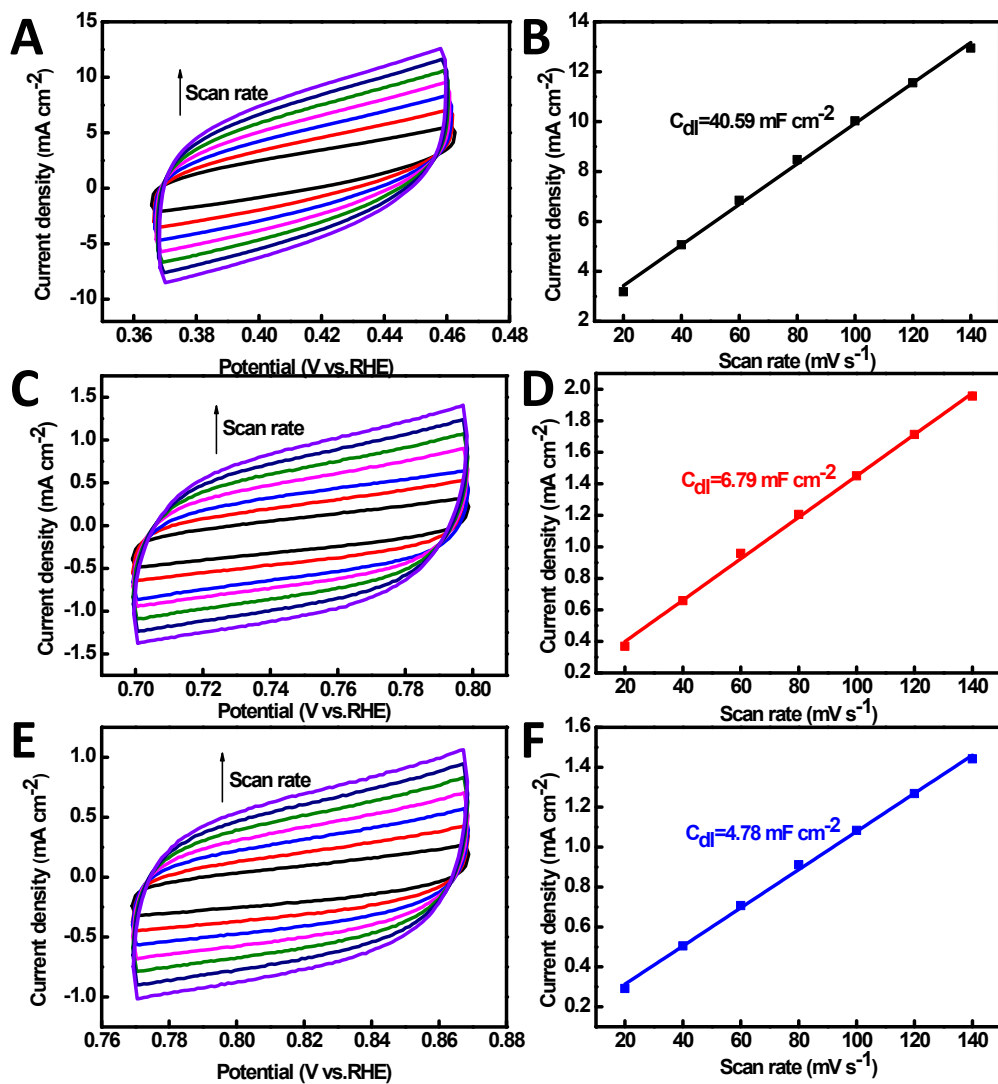

Fig. S5 CV curves of A) P-CoCO<sub>3</sub>/CF, C) CoCO<sub>3</sub>/CF and E) Co Foam at different scan rate in 1 M KOH in the non-faradaic potential region. Plots of current density versus voltage scan rate for B) P-CoCO<sub>3</sub>/CF, D) CoCO<sub>3</sub>/CF and F) Co Foam.

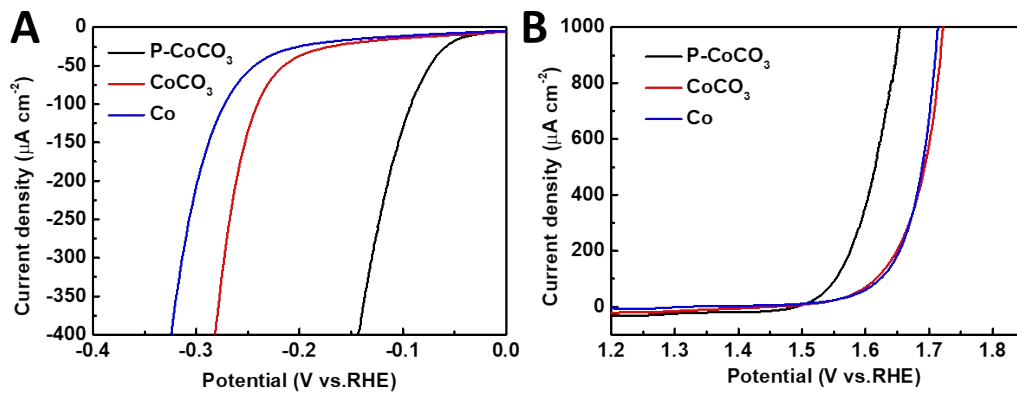

Fig. S6. LSV plots of P-CoCO<sub>3</sub>, CoCO<sub>3</sub> and Co foam for A) HER and B) OER. The current densities are calculated based on ECSA.

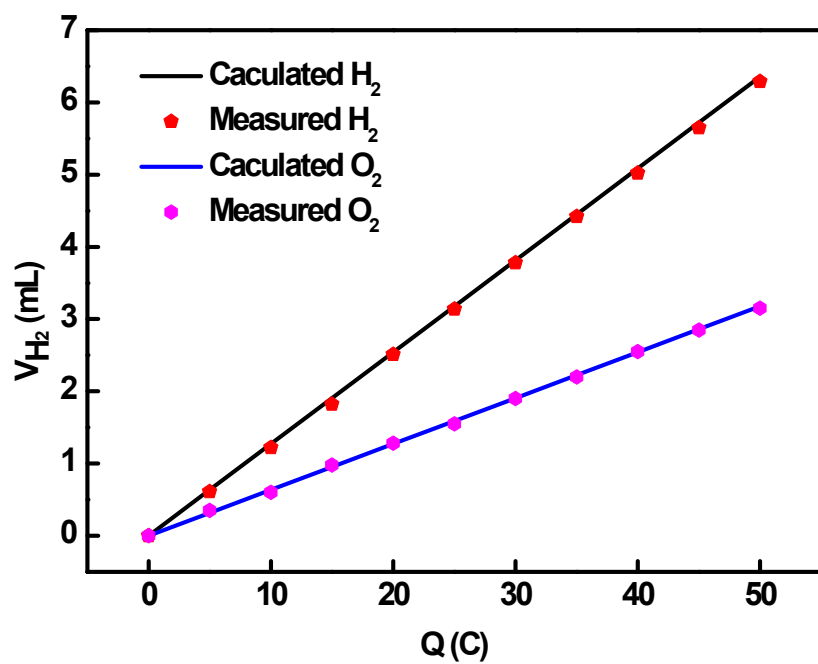

Fig. S7 Quantitative  $H_2$  and  $O_2$  measurement via water displacement.

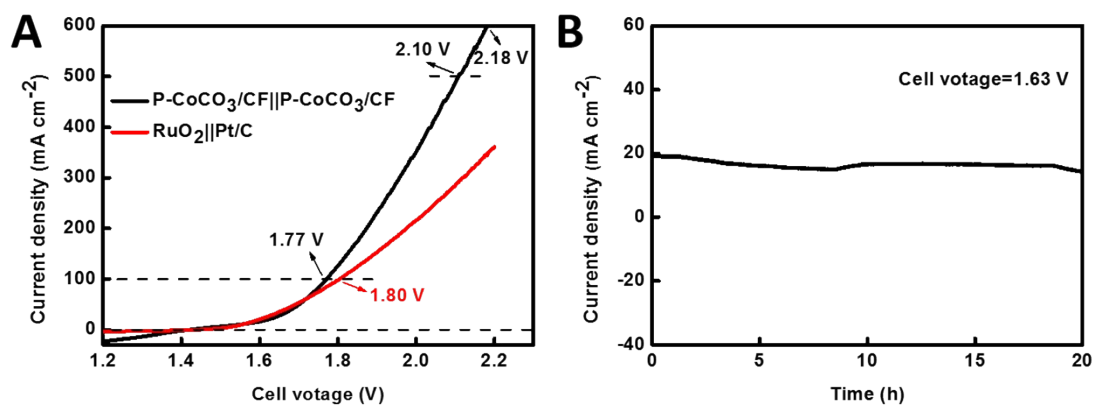

Fig. S8 Performance test for overall water splitting conducted in 1 M KOH. A) LSV curves of the P-CoCO<sub>3</sub>(+)||P-CoCO<sub>3</sub>(-) and RuO<sub>2</sub>(+)||Pt/C(-) electrolytic system toward water splitting. B) Chronoamperometry of water electrolysis of the P-CoCO<sub>3</sub>(+)||P-CoCO<sub>3</sub>(-) system at a voltage of 1.63 V versus RHE.

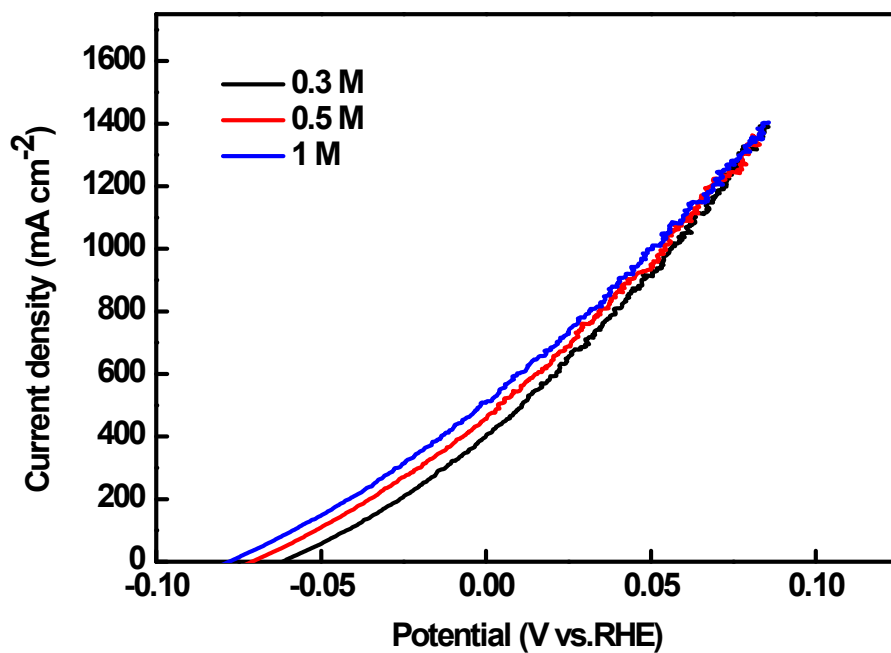

Fig. S9 LSV plots of P-CoCO<sub>3</sub>/CF toward different concentrations of hydrazine (0.3~1 M).

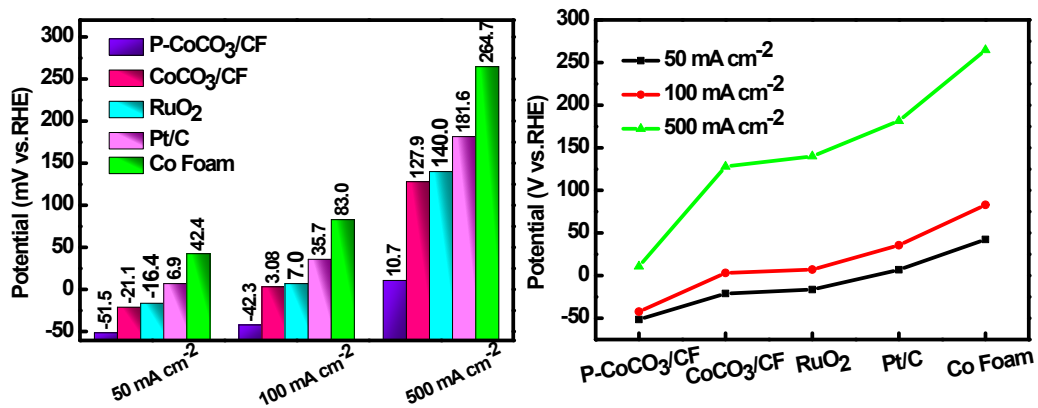

Fig. S10 The overpotentials needed of P-CoCO<sub>3</sub>/CF, CoCO<sub>3</sub>/CF, Co Foam, Pt/C and RuO<sub>2</sub> for HzOR ( $j = 50/100/500 \text{ mA cm}^{-2}$ ).

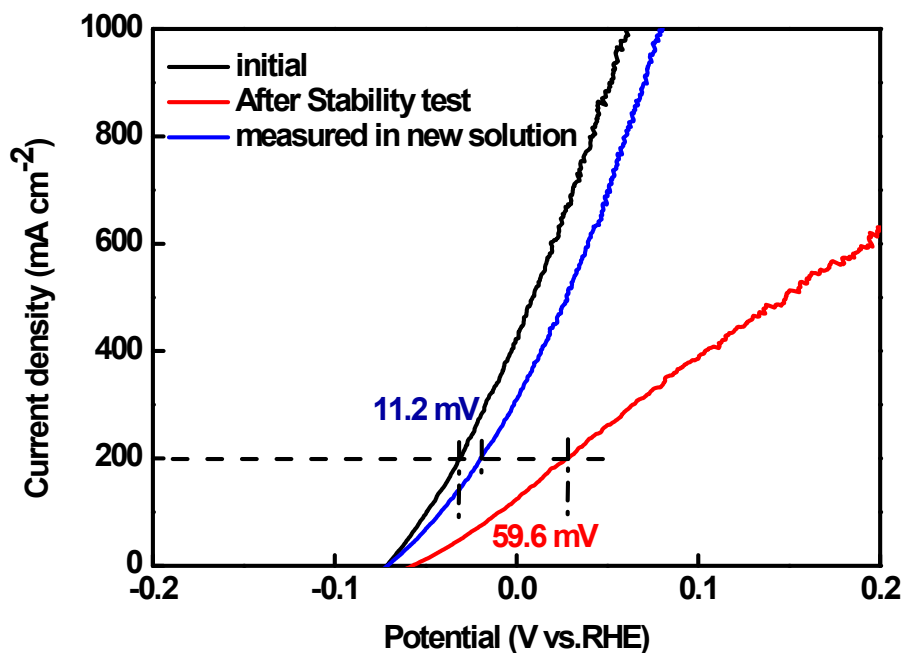

Fig. S11 LSV curves of P-CoCO<sub>3</sub>/CF for initial and after stability test in 1 M KOH with 0.3 M hydrazine solution. Initial performance of P-CoCO<sub>3</sub>/CF for HzOR (black line). The performance of P-CoCO<sub>3</sub>/CF after stability test (red line). The performance of P-CoCO<sub>3</sub>/CF after the stability test tested in the newly configured solution (blue line).

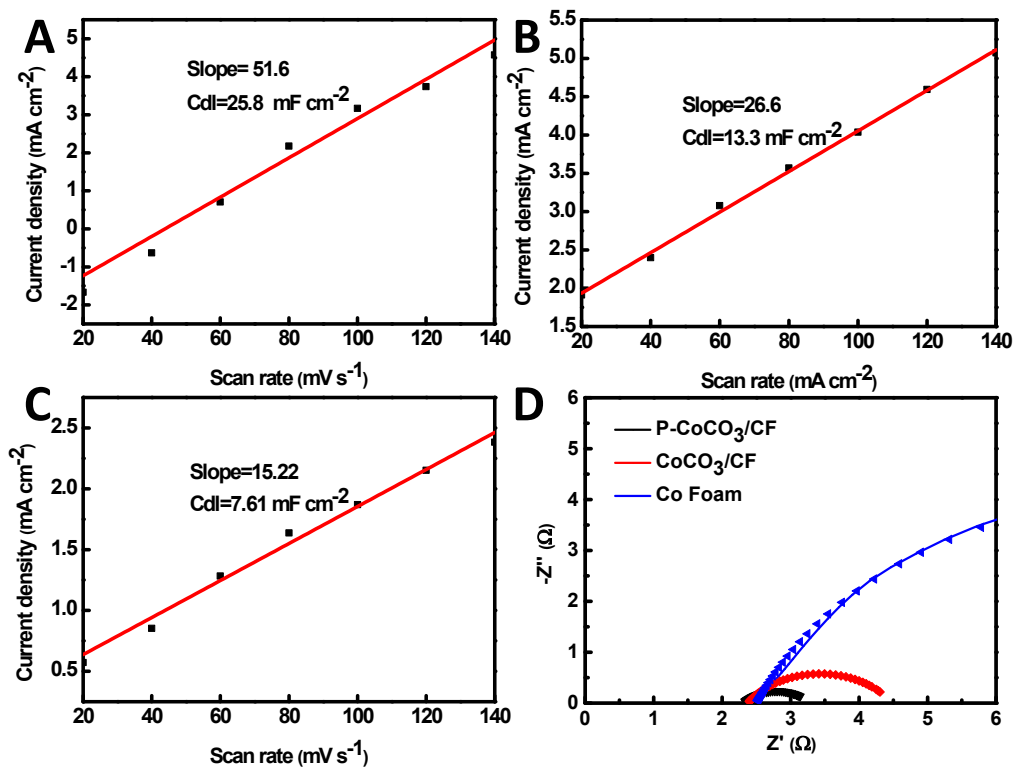

Fig. S12 A, B, C) Plots of current density versus voltage scan rate for P-CoCO<sub>3</sub>/CF, CoCO<sub>3</sub>/CF, Co Foam. D) Nyquist plots together with their fits (scatter plot) for P-CoCO<sub>3</sub>/CF, CoCO<sub>3</sub>/CF, Co Foam. All of the experiments were carried out in 1.0 M KOH with 0.3 M hydrazine.



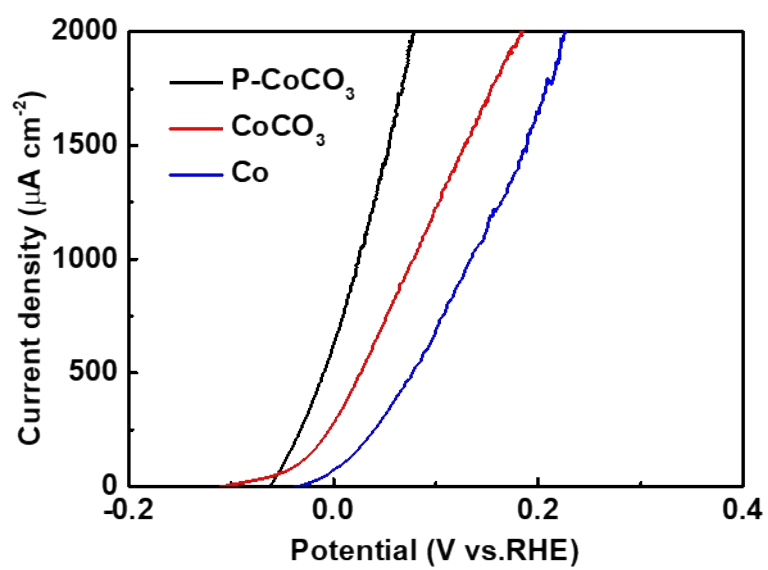

Fig. S13. LSV plots of P-CoCO<sub>3</sub>, CoCO<sub>3</sub> and Co foam for HzOR. The current densities are calculated based on ECSA.

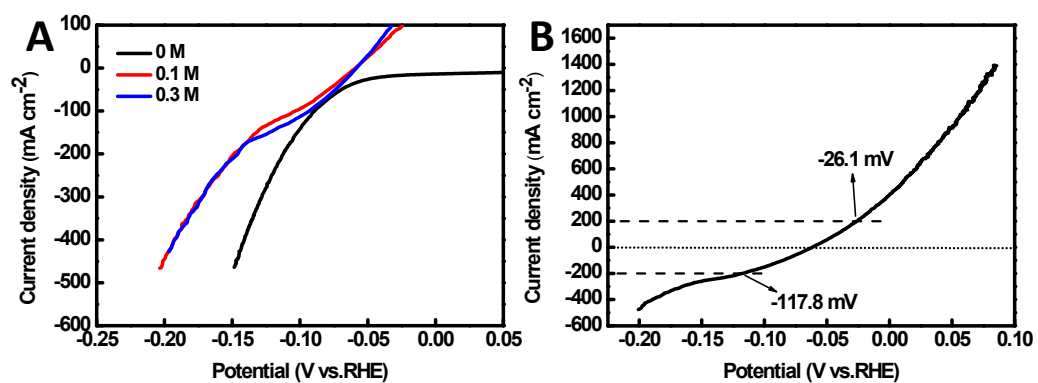

Fig. S14 A) LSV curves for the P-CoCO<sub>3</sub>/CF toward different concentrations of hydrazine. B) LSV curves of P-CoCO<sub>3</sub>/CF for the HER and HzOR in 1 M KOH with 0.3 M N<sub>2</sub>H<sub>4</sub> solution.

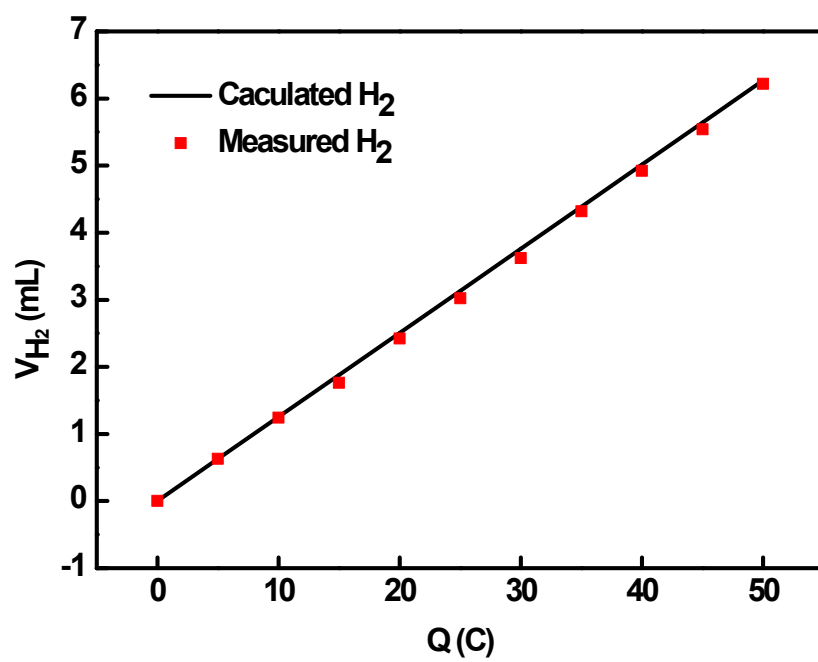

Fig. S15 Faraday efficiency measured for hydrogen production in 1 M KOH with 0.3 M N<sub>2</sub>H<sub>4</sub> solution.

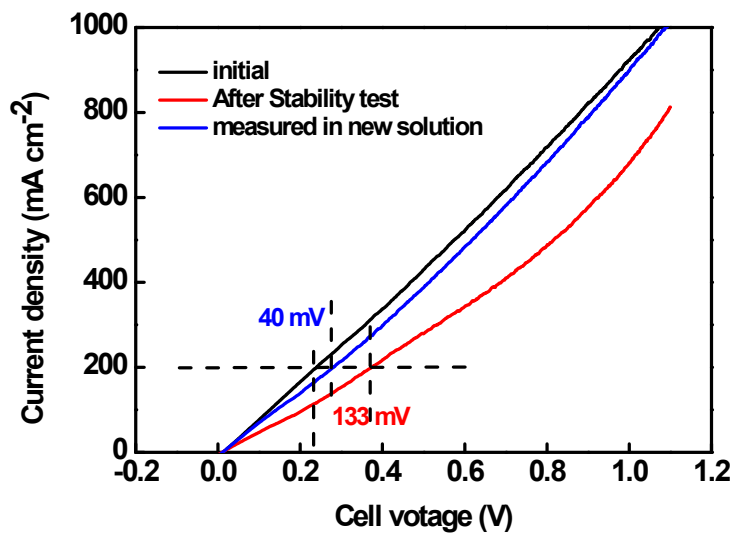

Fig. S16 LSV curves for the P-CoCO<sub>3</sub>/CF(+)||P-CoCO<sub>3</sub>/CF(-) couple for initial and after stability test in 1 M KOH with 0.3 M hydrazine solution. Initial performance of P-CoCO<sub>3</sub>/CF(+)||P-CoCO<sub>3</sub>/CF(-) couple for HzOR (black line). The performance of P-CoCO<sub>3</sub>/CF(+)||P-CoCO<sub>3</sub>/CF(-) couple after stability test (red line). The performance of P-CoCO<sub>3</sub>/CF(+)||P-CoCO<sub>3</sub>/CF(-) couple after the stability test tested in the newly configured solution (blue line).

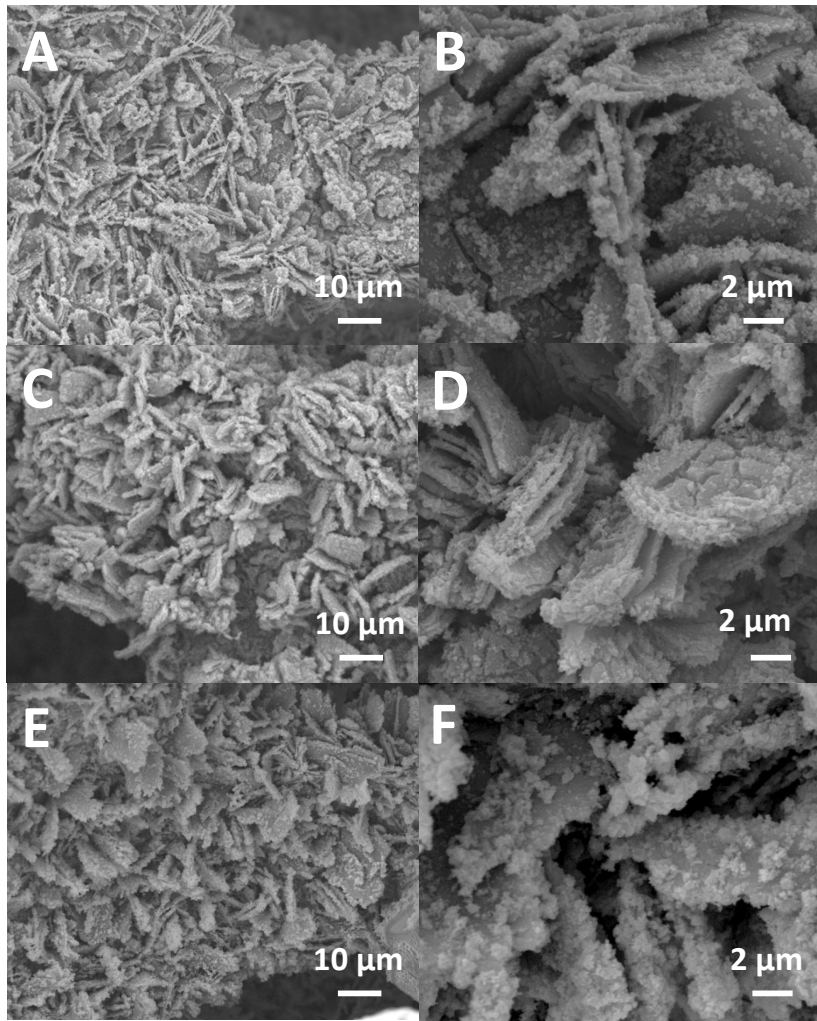

Fig. S17 SEM images of P-CoCO<sub>3</sub>/CF after A, B) HER, C, D) OER and E, F) HzOR stability test.

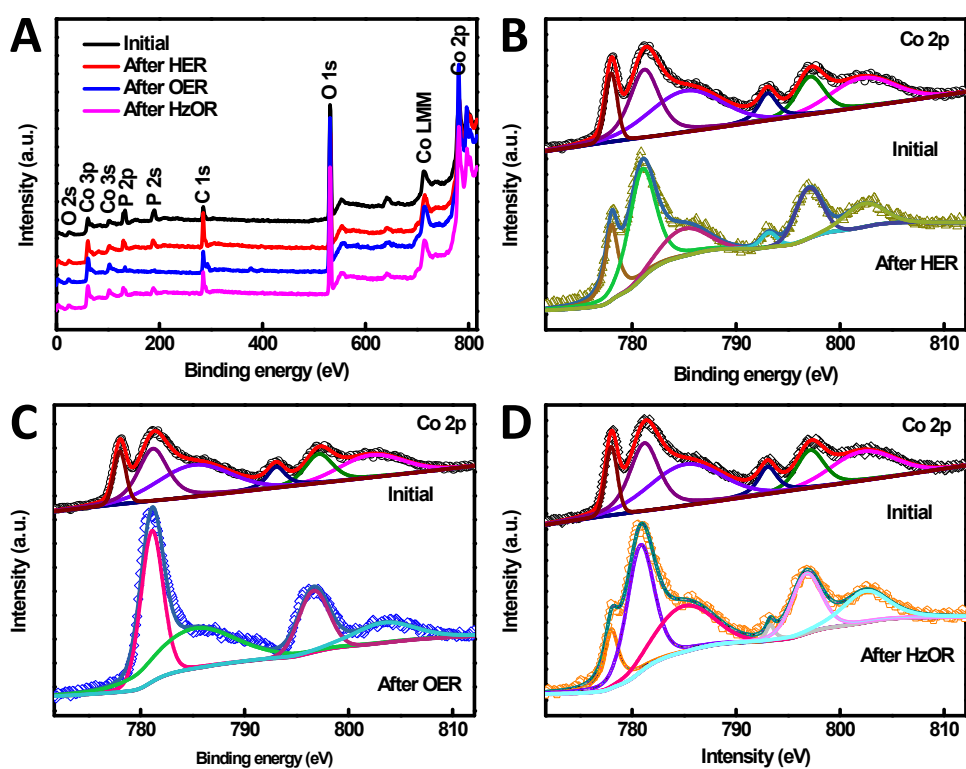

Fig. S18 A) XPS full spectrum of P-CoCO<sub>3</sub>/CF before and after the anode and cathode catalysis. B) XPS spectra of Co 2p for P-CoCO<sub>3</sub>/CF before and after HER test. C) XPS spectra of Co 2p for P-CoCO<sub>3</sub>/CF before and after OER test. D) XPS spectra of Co 2p for P-CoCO<sub>3</sub>/CF before and after HzOR test.

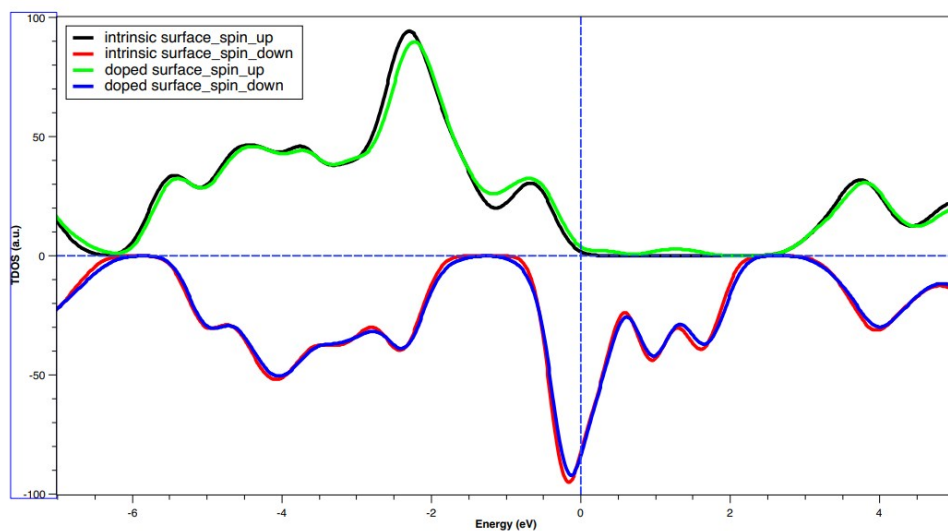

Fig. S19. Total DOS of CoCO<sub>3</sub> and P-CoCO<sub>3</sub> (104) surface. The positive and negative values of PDOS indicated the up and down spins, respectively.

Table S1 The elements content in P-CoCO<sub>3</sub>/CF derived from XPS.

| Element  | Co   | C    | O    | P    |
|----------|------|------|------|------|
| Rate (%) | 14.6 | 15.6 | 51.1 | 18.7 |

Table S2 Comparisons of HER performances of P-CoCO<sub>3</sub>/CF with other cost-effective metal HER catalysts in 1.0 M KOH.

| Catalyst                                              | j (mA cm <sup>-2</sup> ) | Potential (V) | Refs.     |
|-------------------------------------------------------|--------------------------|---------------|-----------|
| Co/CoP                                                | 10                       | 253           | S1        |
| NESSP                                                 | 10                       | 230           | S2        |
| O-Co <sub>2</sub> P                                   | 10                       | 160           | S3        |
| Ni <sub>3</sub> FeN/rGO                               | 10                       | 158           | S4        |
| EG/H-Co <sub>0.85</sub> Se P                          | 10                       | 150           | S5        |
| Co <sub>0.9</sub> S <sub>0.58</sub> P <sub>0.42</sub> | 10                       | 141           | S6        |
| Cu@CoS <sub>x</sub> /NF                               | 10                       | 134           | S7        |
| P-Co <sub>3</sub> O <sub>4</sub>                      | 10                       | 120           | S8        |
| CoP/NCNHP                                             | 10                       | 115           | S9        |
| P <sub>8.6</sub> -Co <sub>3</sub> O <sub>4</sub> /NF  | 10                       | 97            | S10       |
| Fe-CoP/Ti                                             | 10                       | 78            | S11       |
| Fe-Ni <sub>3</sub> C                                  | 10                       | 178           | S12       |
| VOOH                                                  | 10                       | 164           | S13       |
| CoSe <sub>2</sub>                                     | 10                       | 79            | S14       |
| Ni-Co-P                                               | 10                       | 107           | S15       |
| Cu@NiFe LDH                                           | 10                       | 116           | S16       |
| FeS <sub>2</sub>                                      | 10                       | 96            | S17       |
| Co <sub>1</sub> Mn <sub>1</sub> CH                    | 10                       | 180           | S18       |
| O3-V10-Ni <sub>2</sub> P                              | 10                       | 147           | S19       |
| Ni <sub>1.5</sub> Fe <sub>0.5</sub> P                 | 10                       | 282           | S20       |
| CoMoP@C                                               | 10                       | 81            | S21       |
| P-CoCO <sub>3</sub> /CF                               | 10                       | 46            | This work |

Table S3 Comparisons of OER performances of P-CoCO<sub>3</sub>/CF with other cost-effective metal OER catalysts in 1.0 M KOH.

| <b>Catalyst</b>                  | <b>j (mA cm<sup>-2</sup>)</b> | <b>Potential (V)</b> | <b>Refs.</b> |
|----------------------------------|-------------------------------|----------------------|--------------|
| Co/CoP                           | 10                            | 340                  | S1           |
| Ni <sub>3</sub> FeN/rGO          | 10                            | 280                  | S4           |
| P-Co <sub>3</sub> O <sub>4</sub> | 10                            | 280                  | S8           |
| CoP/NCNHP                        | 10                            | 310                  | S9           |
| ACP                              | 10                            | 364                  | S22          |
| Co <sub>9</sub> S <sub>8</sub>   | 10                            | 340                  | S23          |
| CoPS@NPS-C                       | 10                            | 320                  | S24          |
| Co(OH)F                          | 10                            | 313                  | S25          |
| Mo-CoOOH                         | 10                            | 305                  | S26          |
| S:CoP/NF                         | 10                            | 300                  | S27          |
| NiFeOF                           | 10                            | 295                  | S28          |
| B,N:Mo <sub>2</sub> C@BCN        | 10                            | 290                  | S29          |
| NiCo@NiCoO <sub>2</sub> /C       | 20                            | 366                  | S30          |
| Co-Ni <sub>3</sub> N             | 10                            | 307                  | S31          |
| NiSe <sub>2</sub>                | 10                            | 330                  | S32          |
| P-CoCO <sub>3</sub> /CF          | 10/20                         | 275/285              | This work    |



Table S4 Comparisons of overall water-splitting performance of P-CoCO<sub>3</sub>/CF||P-CoCO<sub>3</sub>/CF with other cost-effective metal bifunctional catalysts in 1.0 M KOH.

| Catalyst                                                                                                                                   | j (mA cm <sup>-2</sup> ) | Potential (V) | Refs.     |
|--------------------------------------------------------------------------------------------------------------------------------------------|--------------------------|---------------|-----------|
| NESSP    NESSP                                                                                                                             | 10                       | 510           | S2        |
| Ni <sub>3</sub> FeN/rGO    Ni <sub>3</sub> FeN/rGO                                                                                         | 10                       | 370           | S4        |
| EG/H-Co <sub>0.85</sub> Se   P    EG/H-Co <sub>0.85</sub> Se   P                                                                           | 10                       | 410           | S5        |
| Co <sub>0.9</sub> Se <sub>0.58</sub> P <sub>0.42</sub>    Co <sub>0.9</sub> Se <sub>0.58</sub> P <sub>0.42</sub>                           | 10                       | 360           | S6        |
| Cu@CoS <sub>x</sub> /NF    Cu@CoS <sub>x</sub> /NF                                                                                         | 100                      | 570           | S7        |
| P-Co <sub>3</sub> O <sub>4</sub>    P-Co <sub>3</sub> O <sub>4</sub>                                                                       | 50                       | 530           | S8        |
| CoP/NCNHP    CoP/NCNHP                                                                                                                     | 10                       | 410           | S9        |
| P <sub>8.6</sub> -Co <sub>3</sub> O <sub>4</sub> /NF    P <sub>8.6</sub> -Co <sub>3</sub> O <sub>4</sub> /NF                               | 10                       | 400           | S10       |
| Fe-CoP/Ti    Fe-CoP/Ti                                                                                                                     | 10                       | 370           | S11       |
| VOOH    VOOH                                                                                                                               | 10                       | 390           | S13       |
| Ni-Co-P    Ni-Co-P                                                                                                                         | 10                       | 390           | S15       |
| Co <sub>1</sub> Mn <sub>1</sub> CH    Co <sub>1</sub> Mn <sub>1</sub> CH                                                                   | 10                       | 450           | S18       |
| O3-V10-Ni <sub>2</sub> P    O3-V10-Ni <sub>2</sub> P                                                                                       | 10                       | 333           | S19       |
| Ni <sub>1.5</sub> Fe <sub>0.5</sub> P    Ni <sub>1.5</sub> Fe <sub>0.5</sub> P                                                             | 10                       | 359           | S20       |
| Co <sub>9</sub> S <sub>8</sub>    Co <sub>9</sub> S <sub>8</sub>                                                                           | 10                       | 370           | S23       |
| CoPS@NPS-C    CoPS@NPS-C                                                                                                                   | 10                       | 390           | S24       |
| Mo-CoP    Mo-CoOOH                                                                                                                         | 10                       | 330           | S26       |
| S:CoP/NF    S:CoP/NF                                                                                                                       | 100                      | 550           | S27       |
| NiFeOF    NiFeOF                                                                                                                           | 10                       | 600           | S28       |
| Co <sub>3</sub> O <sub>4</sub> -MTA    Co <sub>3</sub> O <sub>4</sub> -MTA                                                                 | 10                       | 400           | S33       |
| Ni <sub>2</sub> Fe <sub>1</sub> -O    Ni <sub>2</sub> Fe <sub>1</sub> -O                                                                   | 10                       | 410           | S34       |
| FeB <sub>2</sub>    FeB <sub>2</sub>                                                                                                       | 10                       | 340           | S35       |
| Ni <sub>11</sub> (HPO <sub>3</sub> ) <sub>8</sub> (OH) <sub>6</sub>    Ni <sub>11</sub> (HPO <sub>3</sub> ) <sub>8</sub> (OH) <sub>6</sub> | 10                       | 370           | S36       |
| P-CoCO <sub>3</sub> /CF    P-CoCO <sub>3</sub> /CF                                                                                         | 10/50/100                | 319/471/541   | This work |

Table S5. Comparisons of HzOR performances of P-CoCO<sub>3</sub>/CF with other HzOR catalysts.

| <b>Catalyst</b>                                         | <b>Electrolyte</b>                             | <b>j (mA cm<sup>-2</sup>)</b> | <b>Potential (V)</b> | <b>Refs.</b> |
|---------------------------------------------------------|------------------------------------------------|-------------------------------|----------------------|--------------|
| CoSe <sub>2</sub>                                       | 1 M KOH + 0.5 M N <sub>2</sub> H <sub>4</sub>  | 100                           | 170                  | S14          |
| Ni-Zn alloys                                            | 1 M NaOH + 0.1 M N <sub>2</sub> H <sub>4</sub> | 300                           | 400                  | S37          |
| CoNiS                                                   | 0.1 M KOH + 2 M N <sub>2</sub> H <sub>4</sub>  | 147                           | 1200                 | S38          |
| Cu <sub>3</sub> P/CF                                    | 1 M KOH + 0.5 M N <sub>2</sub> H <sub>4</sub>  | 50                            | 98                   | S39          |
| Ni <sub>3</sub> S <sub>2</sub> /NF                      | 1 M KOH + 0.2 M N <sub>2</sub> H <sub>4</sub>  | 100                           | 415                  | S40          |
| Ni <sub>0.5</sub> Co <sub>0.5</sub> Se <sub>2</sub> /CC | 1 M KOH + 0.5 M N <sub>2</sub> H <sub>4</sub>  | 50                            | 8                    | S41          |
| Ni <sub>3</sub> Se <sub>4</sub>                         | 1 M KOH + 0.1 M N <sub>2</sub> H <sub>4</sub>  | 10                            | 370                  | S42          |
| Ni(Cu)/NF                                               | 1 M KOH + 0.5 M N <sub>2</sub> H <sub>4</sub>  | 50                            | 38                   | S43          |
| Pt <sub>0.2</sub> Ni <sub>0.8</sub>                     | 1 M KOH + 0.1 M N <sub>2</sub> H <sub>4</sub>  | 44                            | 500                  | S44          |
| Ni <sub>2</sub> P/NF                                    | 1 M KOH + 0.5 M N <sub>2</sub> H <sub>4</sub>  | 50                            | -25                  | S45          |
| CoP/TiM                                                 | 1 M KOH + 0.1 M N <sub>2</sub> H <sub>4</sub>  | 100                           | -6                   | S46          |
| FeP/NF                                                  | 1 M KOH + 0.5 M N <sub>2</sub> H <sub>4</sub>  | 10                            | 18                   | S47          |
| CoS <sub>2</sub> /TiM                                   | 1 M KOH + 0.1 M N <sub>2</sub> H <sub>4</sub>  | 150                           | 170                  | S48          |
| NiS <sub>2</sub> /TiM                                   | 1 M KOH + 0.5 M N <sub>2</sub> H <sub>4</sub>  | 300                           | 218                  | S49          |
| 3D-PNNF                                                 | 1 M KOH + 1 M N <sub>2</sub> H <sub>4</sub>    | 250                           | 198.6                | S50          |
| P-CoCO <sub>3</sub> /CF                                 | 1 M KOH + 0.3 M N <sub>2</sub> H <sub>4</sub>  | 50/100/300                    | -51.5/-42.3/-12.3    | This work    |

Table S6. Lists of applied voltage for H<sub>2</sub> production from water electrolysis assisted by small molecules oxidation in recent reports.

| Catalyst                                                                                                           | Electrolyte                                   | j (mA cm <sup>-2</sup> ) | Potential (V) | Refs.     |
|--------------------------------------------------------------------------------------------------------------------|-----------------------------------------------|--------------------------|---------------|-----------|
| CoSe <sub>2</sub>    CoSe <sub>2</sub>                                                                             | 1 M KOH + 0.5 M N <sub>2</sub> H <sub>4</sub> | 10                       | 0.165         | S14       |
| Cu <sub>3</sub> P/CF    Cu <sub>3</sub> P/CF                                                                       | 1 M KOH + 0.5 M N <sub>2</sub> H <sub>4</sub> | 100                      | 0.72          | S39       |
| Ni <sub>3</sub> S <sub>2</sub> /NF    Ni <sub>3</sub> S <sub>2</sub> /NF                                           | 1 M KOH + 0.2 M N <sub>2</sub> H <sub>4</sub> | 100                      | 0.867         | S40       |
| Ni <sub>0.5</sub> Co <sub>0.5</sub> Se <sub>2</sub> /CC    Ni <sub>0.5</sub> Co <sub>0.5</sub> Se <sub>2</sub> /CC | 1 M KOH + 0.5 M N <sub>2</sub> H <sub>4</sub> | 10                       | 0.14          | S41       |
| Ni(Cu)/NF    Ni(Cu)/NF                                                                                             | 1 M KOH + 0.5 M N <sub>2</sub> H <sub>4</sub> | 100                      | 0.41          | S43       |
| Ni <sub>2</sub> P/NF    Ni <sub>2</sub> P/NF                                                                       | 1 M KOH + 0.5 M N <sub>2</sub> H <sub>4</sub> | 100                      | 0.45          | S45       |
| CoP/TiM    CoP/TiM                                                                                                 | 1 M KOH + 0.1 M N <sub>2</sub> H <sub>4</sub> | 10                       | 0.2           | S46       |
| FeP/NF    FeP/NF                                                                                                   | 1 M KOH + 0.5 M N <sub>2</sub> H <sub>4</sub> | 125                      | 0.5           | S47       |
| CoS <sub>2</sub> /TiM    CoS <sub>2</sub> /TiM                                                                     | 1 M KOH + 0.1 M N <sub>2</sub> H <sub>4</sub> | 100                      | 0.81          | S48       |
| NiS <sub>2</sub> /TiM    NiS <sub>2</sub> /TiM                                                                     | 1 M KOH + 0.5 M N <sub>2</sub> H <sub>4</sub> | 10                       | 0.34          | S49       |
| S-MnO <sub>2</sub>    S-MnO <sub>2</sub>                                                                           | 1 M KOH + 0.5 M urea                          | 10                       | 1.41          | S51       |
| Zn <sub>0.08</sub> Co <sub>0.92</sub> P/TM    Zn <sub>0.08</sub> Co <sub>0.92</sub> P/TM                           | 1 M KOH + 0.5 M urea                          | 10                       | 1.38          | S52       |
| NiCoP/CC    NiCoP/CC                                                                                               | 1 M KOH + 0.33 M urea                         | 20                       | 1.25          | S53       |
| Ni <sub>3</sub> N/CC    Ni <sub>3</sub> N/CC                                                                       | 1 M KOH + 0.33 M urea                         | 10                       | 1.44          | S54       |
| Ni <sub>2</sub> P/CC    Ni <sub>2</sub> P/CC                                                                       | 1 M KOH + 0.5 M urea                          | 50                       | 1.35          | S55       |
| Fe-CoP/CC    Fe-CoP/CC                                                                                             | 1 M KOH + 5 mL AE                             | 10                       | 1.44          | S56       |
| Ni <sub>2</sub> P NPA/NF    Ni <sub>2</sub> P NPA/NF                                                               | 1 M KOH + 10 mM HMF                           | 10                       | 1.65          | S57       |
| hp-Ni    hp-Ni                                                                                                     | 1 M KOH + 10 mM EtOH                          | 10                       | 1.50          | S58       |
| P-CoCO <sub>3</sub> /CF    P-CoCO <sub>3</sub> /CF                                                                 | 1 M KOH + 0.3 M N <sub>2</sub> H <sub>4</sub> | 100                      | 0.13          | This work |

Table S7. Bond lengths of all the species (Å).

|                                    | Co-N  | N-N   |                                    | Co-N  | N-N   | Clean-surface                 | delta Co-N | delta N-N |
|------------------------------------|-------|-------|------------------------------------|-------|-------|-------------------------------|------------|-----------|
| free N <sub>2</sub> H <sub>4</sub> | 1.961 | 1.438 | free N <sub>2</sub> H <sub>4</sub> |       | 1.438 |                               |            |           |
| N <sub>2</sub> H <sub>4</sub>      | 1.896 | 1.436 | N <sub>2</sub> H <sub>4</sub>      | 1.994 | 1.435 | N <sub>2</sub> H <sub>4</sub> | -0.033     | 0.001     |
| N <sub>2</sub> H <sub>3</sub>      | 1.825 | 1.360 | N <sub>2</sub> H <sub>3</sub>      | 1.942 | 1.371 | N <sub>2</sub> H <sub>3</sub> | -0.046     | -0.011    |
| N <sub>2</sub> H <sub>2</sub>      | 1.836 | 1.276 | N <sub>2</sub> H <sub>2</sub>      | 1.841 | 1.279 | N <sub>2</sub> H <sub>2</sub> | -0.016     | -0.003    |
| N <sub>2</sub> H <sub>1</sub>      | 1.817 | 1.247 | N <sub>2</sub> H <sub>1</sub>      | 1.826 | 1.253 | N <sub>2</sub> H <sub>1</sub> | 0.010      | -0.006    |
| N <sub>2</sub> H <sub>0</sub>      |       | 1.167 | N <sub>2</sub> H <sub>0</sub>      | 1.818 | 1.168 | N <sub>2</sub> H <sub>0</sub> | -0.001     | -0.001    |
| free N <sub>2</sub>                |       | 1.159 | free N <sub>2</sub>                |       | 1.159 |                               |            |           |

## REFERENCE

- S1. Xue, Z.-H.; Su, H.; Yu, Q.-Y.; Zhang, B.; Wang, H.-H.; Li, X.-H.; Chen, J.-S., Janus Co/CoP Nanoparticles as Efficient Mott-Schottky Electrocatalysts for Overall Water Splitting in Wide pH Range. *Adv. Energy Mater.* 2017, 7, 1602355.
- S2. Balogun, M.-S.; Qiu, W.; Huang, Y.; Yang, H.; Xu, R.; Zhao, W.; Li, G.-R.; Ji, H.; Tong, Y., Cost-Effective Alkaline Water Electrolysis Based on Nitrogen- and Phosphorus-Doped Self-Supportive Electrocatalysts. *Adv. Mater.* 2017, 29, 1702095.
- S3. Xu, K.; Ding, H.; Zhang, M.; Chen, M.; Hao, Z.; Zhang, L.; Wu, C.; Xie, Y., Regulating Water-Reduction Kinetics in Cobalt Phosphide for Enhancing HER Catalytic Activity in Alkaline Solution. *Adv. Mater.* 2017, 29, 1606980.
- S4. Gu, Y.; Chen, S.; Ren, J.; Jia, Y. A.; Chen, C.; Komarneni, S.; Yang, D.; Yao, X., Electronic Structure Tuning in Ni<sub>3</sub>FeN/r-GO Aerogel toward Bifunctional Electrocatalyst for Overall Water Splitting. *ACS Nano* 2018, 12 (1), 245-253.
- S5. Hou, Y.; Qiu, M.; Zhang, T.; Zhuang, X.; Kim, C.-S.; Yuan, C.; Feng, X., Ternary Porous Cobalt Phosphoselenide Nanosheets: An Efficient Electrocatalyst for Electrocatalytic and Photoelectrochemical Water Splitting. *Adv. Mater.* 2017, 29, 1701589.
- S6. Dai, Z.; Geng, H.; Wang, J.; Luo, Y.; Li, B.; Zong, Y.; Yang, J.; Guo, Y.; Zheng, Y.; Wang, X.; Yan, Q., Hexagonal-Phase Cobalt Monophosphosulfide for Highly Efficient Overall Water Splitting. *ACS Nano* 2017, 11 (11), 11031-11040.
- S7. Liu, Y.; Li, Q.; Si, R.; Li, G.-D.; Li, W.; Liu, D.-P.; Wang, D.; Sun, L.; Zhang, Y.; Zou, X., Coupling Sub-Nanometric Copper Clusters with Quasi-Amorphous Cobalt Sulfide Yields Efficient and Robust Electrocatalysts for Water Splitting Reaction. *Adv. Mater.* 2017, 29, 1606200.
- S8. Xiao, Z.; Wang, Y.; Huang, Y.-C.; Wei, Z.; Dong, C.-L.; Ma, J.; Shen, S.; Li, Y.; Wang, S., Filling the Oxygen Vacancies in Co<sub>3</sub>O<sub>4</sub> with Phosphorus: an Ultra-efficient Electrocatalyst for overall water splitting. *Energy Environ. Sci.*, 2017, 10, 2563-2569.
- S9. Pan, Y.; Sun, K.; Liu, S.; Cao, X.; Wu, K.; Cheong, W.-C.; Chen, Z.; Wang, Y.; Li, Y.; Liu, Y.; Wang, D.; Peng, Q.; Chen, C.; Li, Y., Core-Shell ZIF-8@ZIF-67-

Derived CoP Nanoparticle-Embedded N-Doped Carbon Nanotube Hollow Polyhedron for Efficient Overall Water Splitting. *J. Am. Chem. Soc.* 2018, 140, 2610-2618.

S10. Wang, Z.; Liu, H.; Ge, R.; Ren, X.; Ren, J.; Yang, D.; Zhang, L.; Sun, X., Phosphorus-Doped  $\text{Co}_3\text{O}_4$  Nanowire Array: A Highly Efficient Bifunctional Electrocatalyst for Overall Water Splitting. *ACS Catal.* 2018, 8, 2236-2241.

S11. Tang, C.; Zhang, R.; Lu, W.; He, L.; Jiang, X.; Asiri, A. M.; Sun, X., Fe-Doped CoP Nanoarray: A Monolithic Multifunctional Catalyst for Highly Efficient Hydrogen Generation. *Adv. Mater.* 2017, 29, 1602441.

S12. Fan, H.; Yu, H.; Zhang, Y.; Zheng, Y.; Luo, Y.; Dai, Z.; Li, B.; Zong, Y.; Yan, Q., Fe-Doped  $\text{Ni}_3\text{C}$  Nanodots in N-Doped Carbon Nanosheets for Efficient Hydrogen-Evolution and Oxygen-Evolution Electrocatalysis. *Angew. Chem. Int. Ed.* 2017, 56, 12566-12570.

S13. Shi, H.; Liang, H.; Ming, F.; Wang, Z., Efficient Overall Water-Splitting Electrocatalysis Using Lepidocrocite VOOH Hollow Nanospheres. *Angew. Chem. Int. Ed.* 2017, 56, 573-577.

S14. Zhang, J.-Y.; Wang, H.; Tian, Y.; Yan, Y.; Xue, Q.; He, T.; Liu, H.; Wang, C.; Chen, Y.; Xia, B. Y., Anodic Hydrazine Oxidation Assists Energy-Efficient Hydrogen Evolution over a Bifunctional Cobalt Perselenide Nanosheet Electrode. *Angew. Chem. Int. Ed.* 2018, 57, 7649-7653.

S15. Hu, E.; Feng, Y.; Nai, J.; Zhao, D.; Hu, Y.; Lou, X. W., Construction of Hierarchical Ni-Co-P Hollow Nanobricks with Oriented Nanosheets for Efficient Overall Water Splitting. *Energy Environ. Sci.*, 2018, 11, 872-880.

S16. Yu, L.; Zhou, H.; Sun, J.; Qin, F.; Yu, F.; Bao, J.; Yu, Y.; Chen, S.; Ren, Z., Cu Nanowires Shelled with NiFe Layered Double Hydroxide Nanosheets as Bifunctional Electrocatalysts for Overall Water Splitting. *Energy Environ. Sci.*, 2017, 10, 1820-1827.

S17. Miao, R.; Dutta, B.; Sahoo, S.; He, J.; Zhong, W.; Cetegen, S. A.; Jiang, T.; Alpay, S. P.; Suib, S. L., Mesoporous Iron Sulfide for Highly Efficient Electrocatalytic Hydrogen Evolution. *J. Am. Chem. Soc.* 2017, 139, 13604-13607.

S18. Tang, T.; Jiang, W. J.; Niu, S.; Liu, N.; Luo, H.; Chen, Y.-Y.; Jin, S.-F.; Gao, F.;

Wan, L.-J.; Hu, J.-S., Electronic and Morphological Dual Modulation of Cobalt Carbonate Hydroxides by Mn Doping toward Highly Efficient and Stable Bifunctional Electrocatalysts for Overall Water Splitting. *J. Am. Chem. Soc.* 2017, 139, 8320-8328.

S19. Dinh, K. N.; Sun, X.; Dai, Z.; Zheng, Y.; Zheng, P.; Yang, J.; Xu, J.; Wang, Z.; Yan, Q., O<sub>2</sub> Plasma and Cation Tuned Nickel Phosphide Nanosheets for Highly Efficient Overall Water Splitting. *Nano Energy* 2018, 54, 82-90.

S20. Huang, H.; Yu, C.; Zhao, C.; Han, X.; Yang, J.; Liu, Z.; Li, S.; Zhang, M.; Qiu, J., Iron-tuned Super Nickel Phosphide Microstructures with High Activity for Electrochemical Overall Water Splitting. *Nano Energy* 2017, 34, 472-480.

S21. Ma, Y.-Y.; Wu, C.-X.; Feng, X.-J.; Tan, H.-Q.; Yan, L.-K.; Liu, Y.; Kang, Z.-H.; Wang, E.-B.; Li, Y.-G., Highly Efficient Hydrogen Evolution from Seawater by a Low-cost and Stable CoMoP@C Electrocatalyst Superior to Pt/C. *Energy Environ. Sci.*, 2017, 10, 788-798.

S22. Kim, J. S.; Park, I.; Jeong, E.-S.; Jin, K.; Seong, W. M.; Yoon, G.; Kim, H.; Kim, B.; Nam, K. T.; Kang, K., Amorphous Cobalt Phyllosilicate with Layered Crystalline Motifs as Water Oxidation Catalyst. *Adv. Mater.* 2017, 29, 1606893.

S23. Huang, S.; Meng, Y.; He, S.; Goswami, A.; Wu, Q.; Li, J.; Tong, S.; Asefa, T.; Wu, M., N-, O-, and S-Tridoped Carbon-Encapsulated Co<sub>9</sub>S<sub>8</sub> Nanomaterials: Efficient Bifunctional Electrocatalysts for Overall Water Splitting. *Adv. Funct. Mater.* 2017, 27, 1606585.

S24. Hu, Y.; Li, F.; Long, Y.; Yang, H.; Gao, L.; Long, X.; Hu, H.; Xu, N.; Jin, J.; Ma, J., Ultrafine CoPS Nanoparticles Encapsulated in N, P, and S tri-doped Porous Carbon as an Efficient Bifunctional Water Splitting Electrocatalyst in Both Acid and Alkaline Solutions. *J. Mater. Chem. A* 2018, 6, 10433-10440.

S25. Wan, S.; Qi, J.; Zhang, W.; Wang, W.; Zhang, S.; Liu, K.; Zheng, H.; Sun, J.; Wang, S.; Cao, R., Hierarchical Co(OH)F Superstructure Built by Low-Dimensional Substructures for Electrocatalytic Water Oxidation. *Adv. Mater.* 2017, 29, 1700286.

S26. Guan, C.; Xiao, W.; Wu, H.; Liu, X.; Zang, W.; Zhang, H.; Ding, J.; Feng, Y. P.; Pennycook, S. J.; Wang, J., Hollow Mo-doped CoP nanoarrays for efficient overall water splitting. *Nano Energy* 2018, 48, 73-80.

- S27. Anjum, M. A. R.; Okyay, M. S.; Kim, M.; Lee, M. H.; Park, N.; Lee, J. S., Bifunctional Sulfur-doped Cobalt Phosphide Electrocatalyst Outperforms All-noble-metal Electrocatalysts in Alkaline Electrolyzer for Overall Water Splitting. *Nano Energy* 2018, 53, 286-295.
- S28. Liang, K.; Guo, L.; Marcus, K.; Zhang, S.; Yang, Z.; Perea, D. E.; Zhou, L.; Du, Y.; Yang, Y., Overall Water Splitting with Room-Temperature Synthesized NiFe Oxyfluoride Nanoporous Films. *ACS Catal.* 2017, 7, 8406-8412.
- S29. Anjum, M. A. R.; Lee, M. H.; Lee, J. S., Boron and Nitrogen Co-doped Molybdenum Carbide Nanoparticles Imbedded in BCN Network as a Bifunctional Electrocatalyst for Hydrogen and Oxygen Evolution Reactions. *ACS Catal.* 2018, 8296-8305.
- S30. Xu, H.; Shi, Z.-X.; Tong, Y.-X.; Li, G.-R., Porous Microrod Arrays Constructed by Carbon-Confined NiCo@NiCoO<sub>2</sub> Core@Shell Nanoparticles as Efficient Electrocatalysts for Oxygen Evolution. *Adv. Mater.* 2018, 30, 1705442.
- S31. Zhu, C.; Wang, A.-L.; Xiao, W.; Chao, D.; Zhang, X.; Tiep, N. H.; Chen, S.; Kang, J.; Wang, X.; Ding, J.; Wang, J.; Zhang, H.; Fan, H. J., In Situ Grown Epitaxial Heterojunction Exhibits High-Performance Electrocatalytic Water Splitting. *Adv Mater* 2018, 30, 1705516.
- S32. Chen, S.; Kang, Z.; Hu, X.; Zhang, X.; Wang, H.; Xie, J.; Zheng, X.; Yan, W.; Pan, B.; Xie, Y., Delocalized Spin States in 2D Atomic Layers Realizing Enhanced Electrocatalytic Oxygen Evolution. *Adv. Mater.* 2017, 29, 1701687.
- S33. Zhu, Y. P.; Ma, T. Y.; Jaroniec, M.; Qiao, S. Z., Self-Templating Synthesis of Hollow Co<sub>3</sub>O<sub>4</sub> Microtube Arrays for Highly Efficient Water Electrolysis. *Angew. Chem. Int. Ed.* 2017, 56, 1324-1328.
- S34. Dong, C.; Kou, T.; Gao, H.; Peng, Z.; Zhang, Z., Eutectic-Derived Mesoporous Ni-Fe-O Nanowire Network Catalyzing Oxygen Evolution and Overall Water Splitting. *Adv. Energy Mater.* 2018, 8, 1701347.
- S35. Li, H.; Wen, P.; Li, Q.; Dun, C.; Xing, J.; Lu, C.; Adhikari, S.; Jiang, L.; Carroll, D. L.; Geyer, S. M., Earth-Abundant Iron Diboride (FeB<sub>2</sub>) Nanoparticles as Highly Active Bifunctional Electrocatalysts for Overall Water Splitting. *Adv. Energy Mater.*

2017, 7, 1700513.

S36. Menezes, P. W.; Panda, C.; Loos, S.; Bunschei-Bruns, F.; Walter, C.; Schwarze, M.; Deng, X.; Dau, H.; Driess, M., A structurally Versatile Nickel Phosphite Acting as a Robust Bifunctional Electrocatalyst for Overall Water Splitting. *Energy Environ. Sci.*, 2018, 11, 1287-1298.

S37. Wu, L.-S.; Dai, H.-B.; Wen, X.-P.; Wang, P., Ni-Zn Alloy Nanosheets Arrayed on Nickel Foam as a Promising Catalyst for Electrooxidation of Hydrazine. *ChemElectroChem* 2017, 4 (8), 1944-1949.

S38. Zhou, L.; Shao, M.; Zhang, C.; Zhao, J.; He, S.; Rao, D.; Wei, M.; Evans, D. G.; Duan, X., Hierarchical CoNi-Sulfide Nanosheet Arrays Derived from Layered Double Hydroxides toward Efficient Hydrazine Electrooxidation. *Adv. Mater.* 2017, 29, 1604080.

S39. Liu, M.; Zhang, R.; Zhang, L.; Liu, D.; Hao, S.; Du, G.; Asiri, A. M.; Kong, R.; Sun, X., Energy-efficient Electrolytic Hydrogen Generation using a Cu<sub>3</sub>P Nanoarray as a Bifunctional Catalyst for Hydrazine Oxidation and Water Reduction. *Inorg. Chem. Front.* 2017, 4, 420-423.

S40. Liu, G.; Sun, Z.; Zhang, X.; Wang, H.; Wang, G.; Wu, X.; Zhang, H.; Zhao, H., Vapor-phase Hydrothermal Transformation of a Nanosheet Array Structure Ni(OH)<sub>2</sub> into Ultrathin Ni<sub>3</sub>S<sub>2</sub> Nanosheets on Nickel Foam for High-efficiency Overall Water Splitting. *J. Mater. Chem. A* 2018, 6, 19201-19209.

S41. Wang, G.; Chen, J.; Cai, P.; Jia, J.; Wen, Z., A self-supported Ni-Co Perselenide Nanorod Array as a High-activity Bifunctional Electrode for a Hydrogen-producing Hydrazine Fuel Cell. *J. Mater. Chem. A* 2018, 6, 17763-17770.

S42. Zhang, J.-Y.; Tian, X.; He, T.; Zaman, S.; Miao, M.; Yan, Y.; Qi, K.; Dong, Z.; Liu, H.; Xia, B. Y., *In situ* Formation of Ni<sub>3</sub>Se<sub>4</sub> Nanorod Arrays as Versatile Electrocatalysts for Electrochemical Oxidation Reactions in Hybrid Water Electrolysis. *J. Mater. Chem. A* 2018, 6, 15653-15658.

S43. Sun, Q.; Wang, L.; Shen, Y.; Zhou, M.; Ma, Y.; Wang, Z.; Zhao, C., Bifunctional Copper-Doped Nickel Catalysts Enable Energy-Efficient Hydrogen Production via Hydrazine Oxidation and Hydrogen Evolution Reduction. *ACS Sustainable Chem. Eng.*



2018, 6, 12746–12754.

S44. Wang, J.; Khaniya, A.; Hu, L.; Beazley, M. J.; Kaden, W. E.; Feng, X., A Bifunctional Catalyst for Efficient Dehydrogenation and Electro-oxidation of Hydrazine. *J. Mater. Chem. A* 2018, 6, 18050-18056.

S45. Tang, C.; Zhang R.; Lu, W.; Wang, Z.; Liu, D.; Hao, S.; Gu, D.; Asiri, A. M.; Sun, X., Energy-Saving Electrolytic Hydrogen Generation: Ni<sub>2</sub>P Nanoarray as a High-Performance Non-Noble-Metal Electrocatalyst. *Angew. Chem.* 2017, 129, 860–864.

S46. Wang, J.; Kong, R.; Asiri, A. M.; Sun, X., Replacing Oxygen Evolution with Hydrazine Oxidation at the Anode for Energy-Saving Electrolytic Hydrogen Production. *ChemElectroChem* 2017, 4, 481-484.

S47. Zhang, L.; Liu, D.; Hao, S.; Xie, L.; Qu, F.; Du, G.; Asiri, A. M.; Sun, X., Electrochemical Hydrazine Oxidation Catalyzed by Iron Phosphide Nanosheets Array toward Energy-Efficient Electrolytic Hydrogen Production from Water. *ChemistrySelect* 2017, 2 (12), 3401-3407.

S48. Ma, X.; Wang, J.; Liu, D.; Kong, R.; Hao, S.; Du, G.; Asiri, A. M.; Sun, X., Hydrazine-assisted Electrolytic Hydrogen Production: CoS<sub>2</sub> Nanoarray as a Superior Bifunctional Electrocatalyst. *NewJ.Chem.* 2017, 41, 4754-4757.

S49. Wang, J.; Ma, X.; Liu, T.; Liu, D.; Hao, S.; Du, G.; Kong, R.; Asiri, A. M.; Sun, X., NiS<sub>2</sub> Nanosheet Array: A high-active Bifunctional Electrocatalyst for Hydrazine Oxidation and Water Reduction toward Energy-efficient Hydrogen Production. *Mater. Today Energy* 2017, 3, 9-14.

S50. Feng, G.; Kuang, Y.; Li, Y.; Sun, X., Three-dimensional Porous Superaerophobic Nickel Nanoflower Electrodes for High-performance Hydrazine Oxidation. *Nano Research* 2015, 8, 3365-3371.

S51. Chen, S.; Duan, J.; Vasileff, A.; Qiao, S. Z. Size Fractionation of Two-Dimensional Sub-Nanometer Thin Manganese Dioxide Crystals towards Superior Urea Electrocatalytic Conversion, *Angew. Chem. Int. Ed.* 2016, 55, 3804–3808.

S52. Liu, T.; Liu, D.; Qu, F.; Wang, D.; Zhang, L.; Ge, R.; Hao, S.; Ma, Y.; Du, G.; Asiri, A. M.; Chen, L.; Sun, X., Enhanced Electrocatalysis for Energy-Efficient Hydrogen Production over CoP Catalyst with Nonelectroactive Zn as a Promoter. *Adv.*

*Energy Mater.* 2017, 7, 1700020.

S53. Xie, L.; Liu, Q.; Luo, Y.; Liu, Z.; Xu, Y.; Asiri, A. M.; Sun, X.; Xie, F., Bimetallic NiCoP Nanosheets Array for High-Performance Urea Electro-Oxidation and Less Energy-Intensive Electrolytic Hydrogen Production. *ChemistrySelect* 2017, 2, 10285-10289.

S54. Liu, Q.; Xie, L.; Qu, F.; Liu, Z.; Du, G.; Asiri, A. M.; Sun, X., A porous Ni<sub>3</sub>N Nanosheet Array as a High-performance Non-noble-metal Catalyst for Urea-assisted Electrochemical Hydrogen Production. *Inorg. Chem. Front.* 2017, 4, 1120-1124.

S55. Liu, D.; Liu, T.; Zhang, L.; Qu, F.; Du, G.; Asiri, A. M.; Sun, X., High-performance Urea Electrolysis towards Less Energy-intensive Electrochemical Hydrogen Production using a Bifunctional Catalyst Electrode. *J. Mater. Chem. A* 2017, 5, 3208-3213.

S56. Hao, S.; Yang, L.; Liu, D.; Kong, R.; Du, G.; Asiri, A. M.; Yang, Y.; X. Sun, Integrating natural biomass electro-oxidation and hydrogen evolution: using a porous Fe-doped CoP nanosheet array as a bifunctional catalyst, *Chem. Commun.*, 2017, 53, 5710-5713.

S57. You, B.; Jiang, N.; Liu, X.; Sun, Y., Simultaneous H<sub>2</sub> Generation and Biomass Upgrading in Water by an Efficient Noble-Metal-Free Bifunctional Electrocatalyst, *Angew. Chem. Int. Ed.* 2016, 55, 9913–9917.

S58. You, B.; Liu, X.; Liu, X.; Sun, Y., Efficient H<sub>2</sub> Evolution Coupled with Oxidative Refining of Alcohols via A Hierarchically Porous Nickel Bifunctional Electrocatalyst. *ACS Catal.* 2017, 7 (7), 4564-4570.
